# Supplementary material for: Colistin exposure enhances expression of eptB in colistin-resistant Escherichia coli co-harboring mcr-1
Source: PubMed Central journal article supplement (PMC8789769; doi:10.1038/s41598-022-05435-0), 2022-01-25
Supplement: 41598_2022_5435_MOESM1_ESM.pdf [file 41598_2022_5435_MOESM1_ESM.pdf]

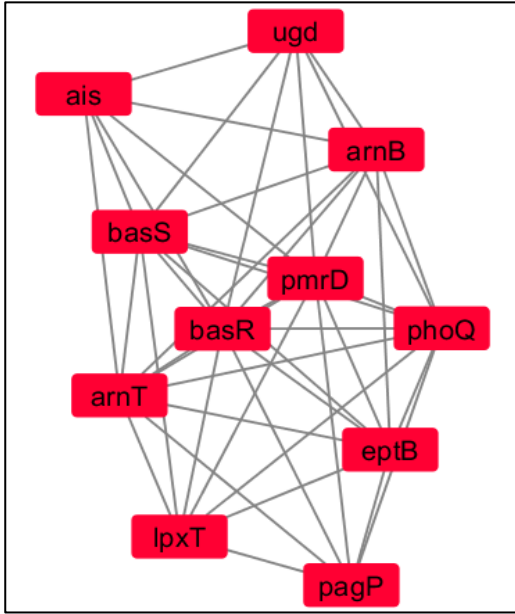

i

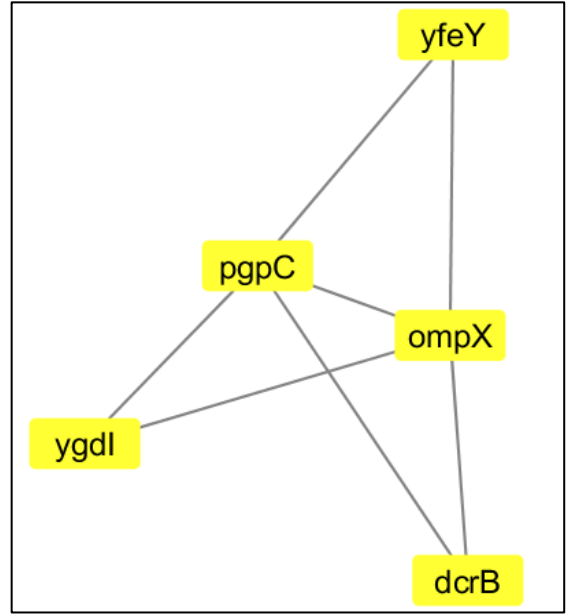

ii

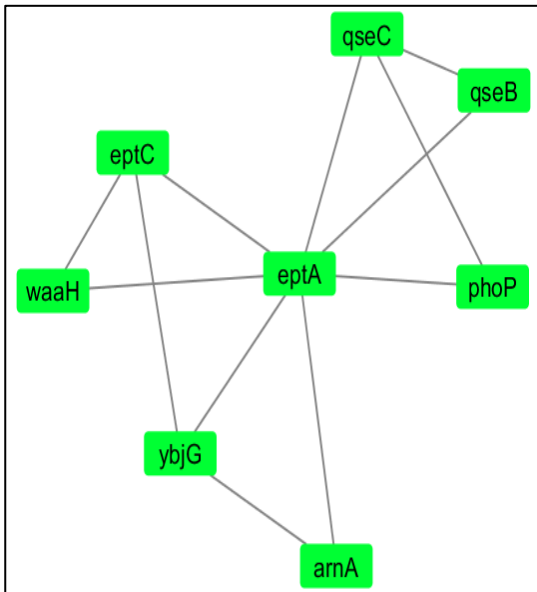

iii

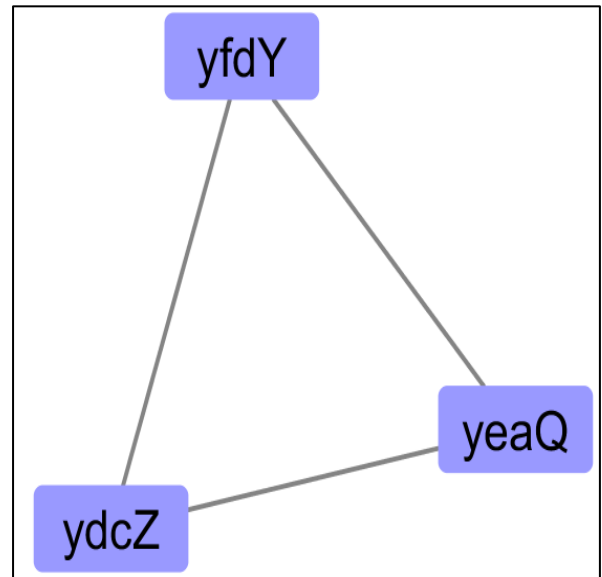

iv

Supplementary figure S1: i. Cluster 1, ii. Cluster 2, iii. Cluster 3 and,iv. Cluster 4 of the network as generated by Cytoscape

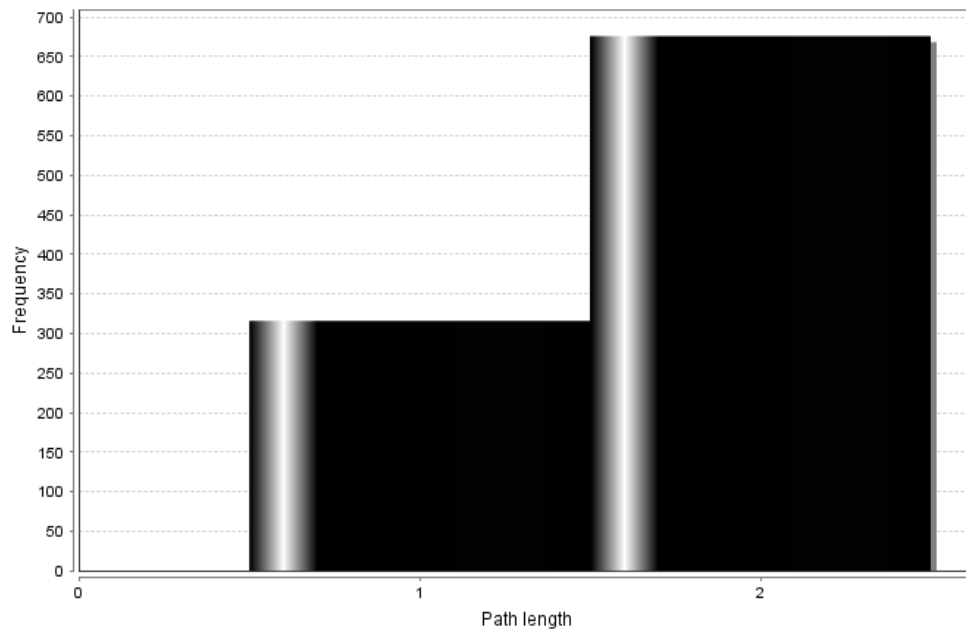

v. Average shortest path length

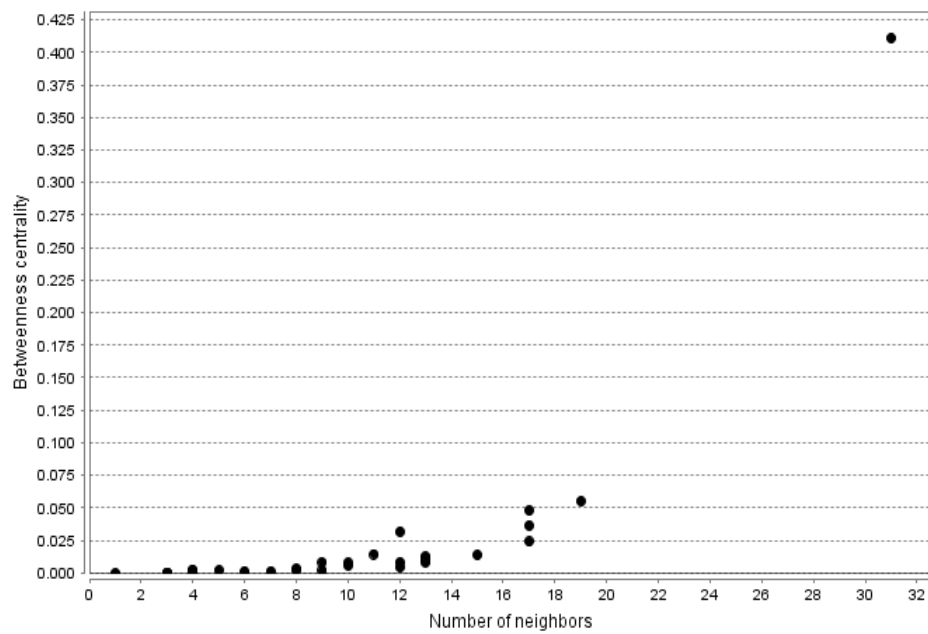

vi. Betweenness centrality

Supplementary figure S2: v and vi shows the topological parameters of the functional partners as generated by Cytoscape

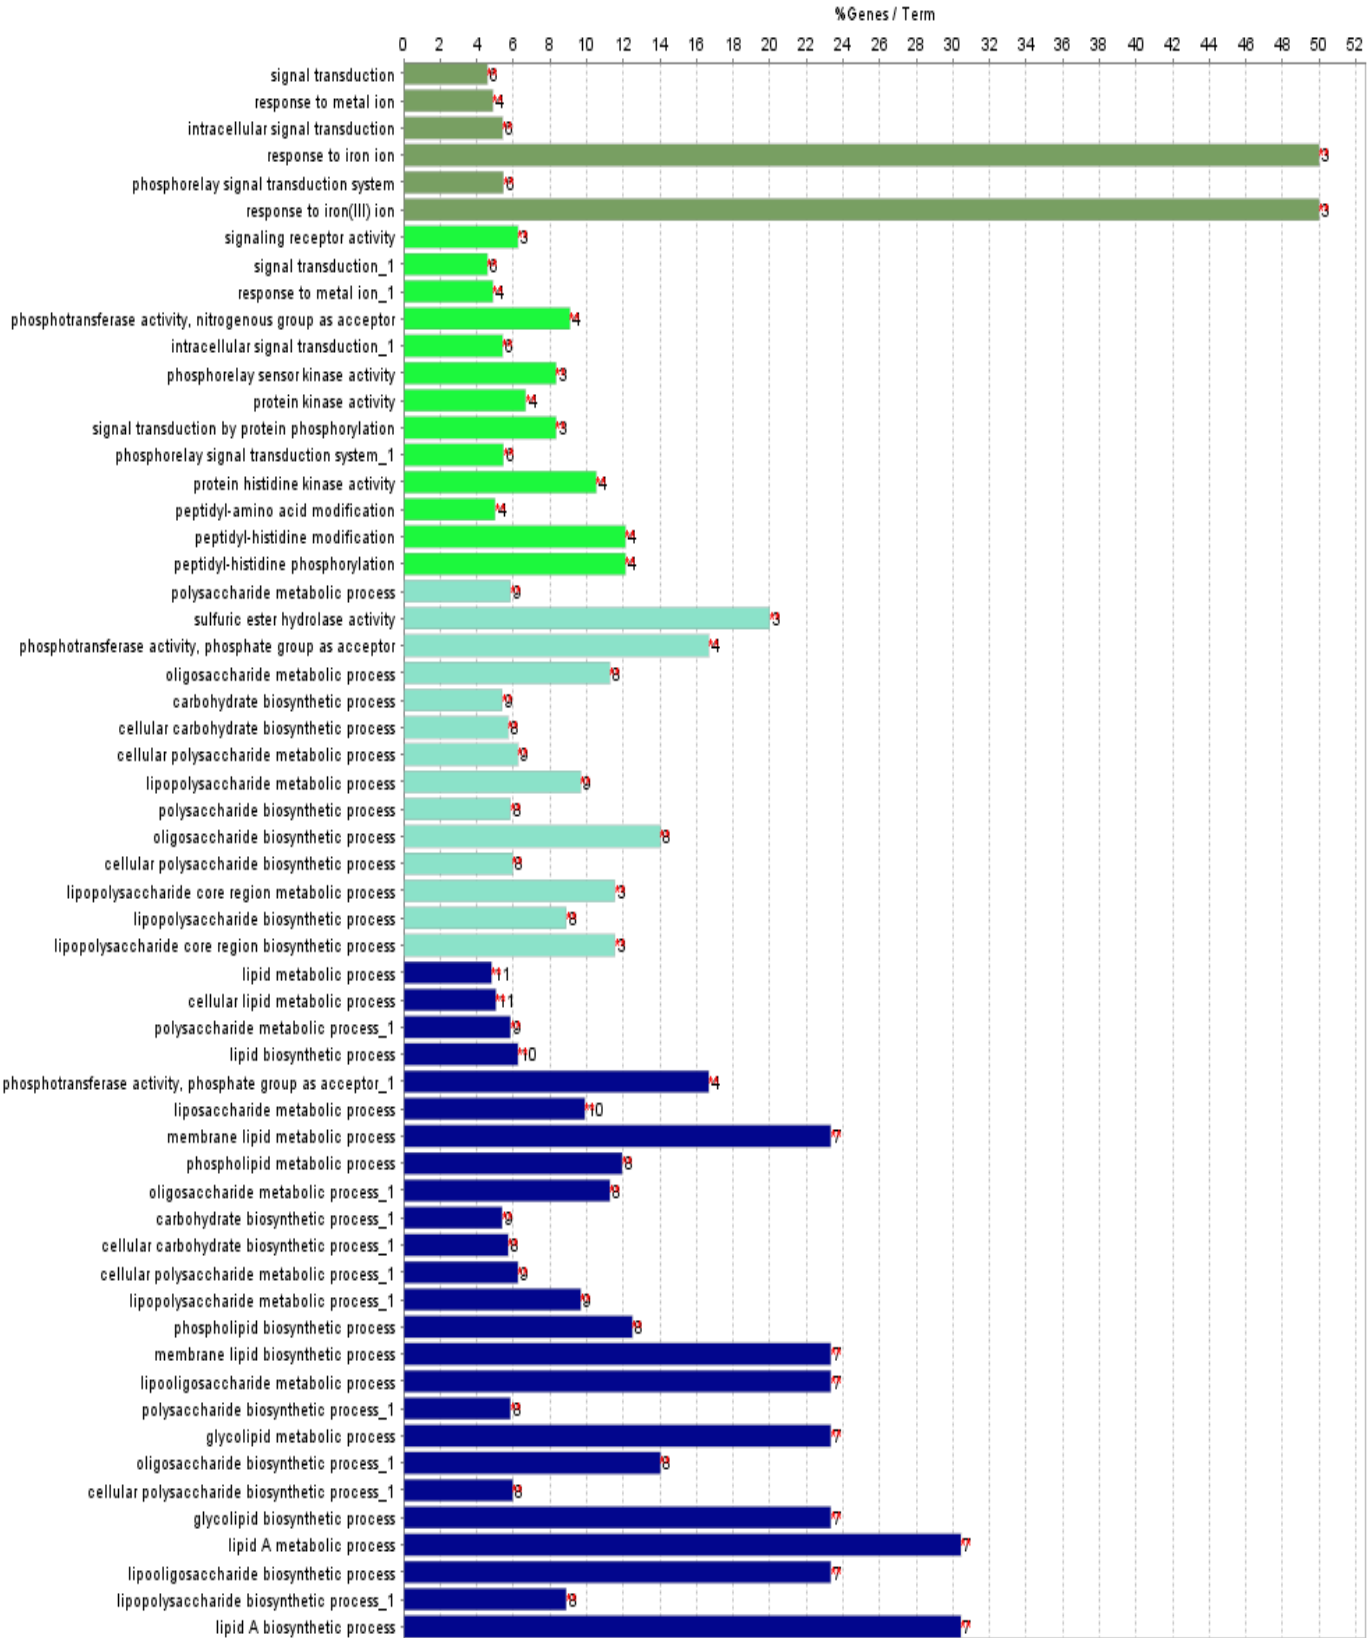

vii. Enriched GO terms associated with the functional partners

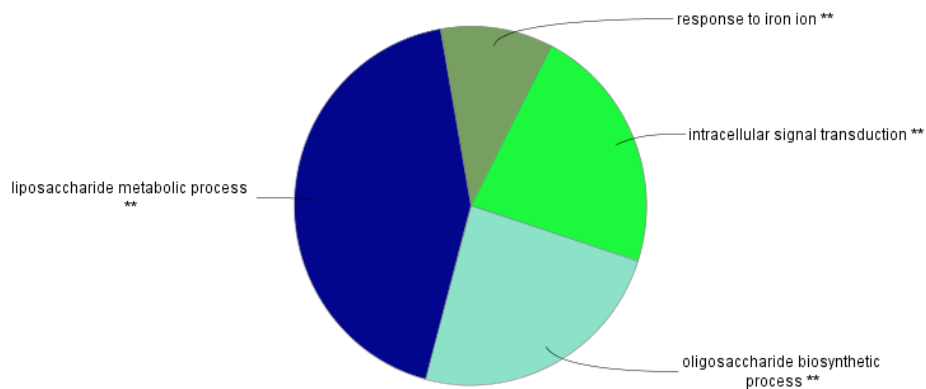

viii. Pie-chart indicates overview specific enriched clusters of the network. (Double (\*\*)  
asterisk indicate significant enriched GO terms at the  $p < 0.01$  statistical levels)

Supplementary figure S3: vii and viii Functional enrichment analysis of the functional  
partners as generated by ClueGO of Cytoscape

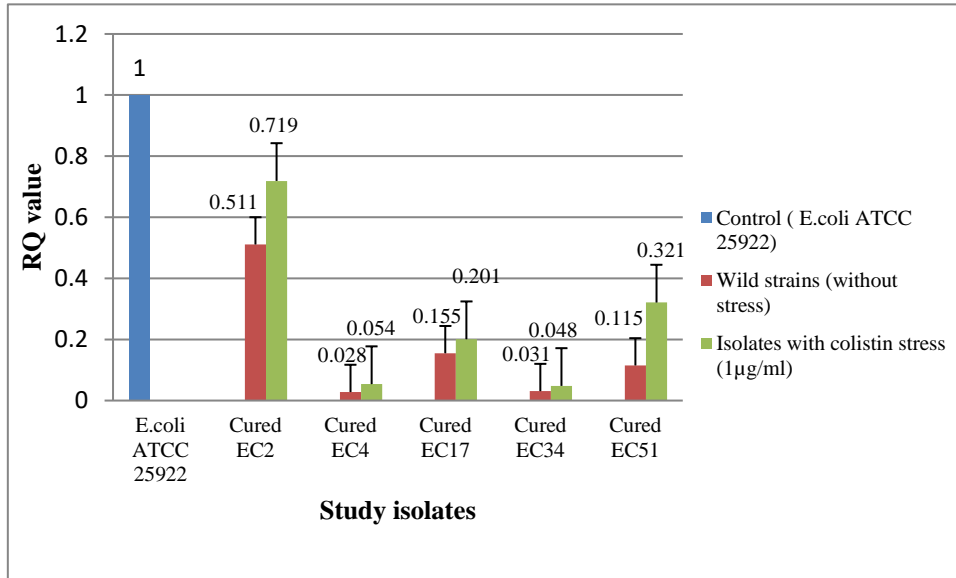

Supplementary figure S4: Transcriptional analysis of *eptA* for cured mutants

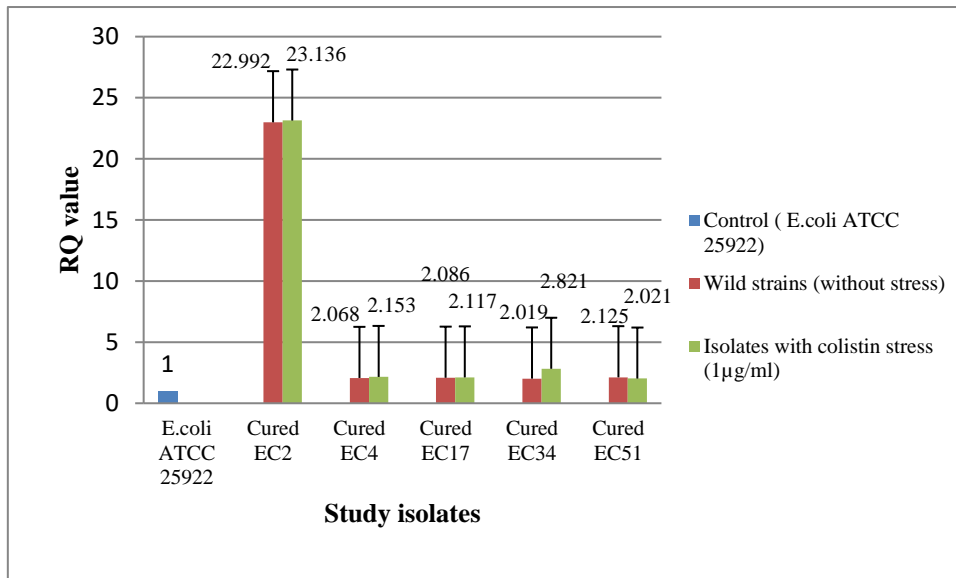

Supplementary figure S5: Transcriptional analysis of *eptB* for cured mutants

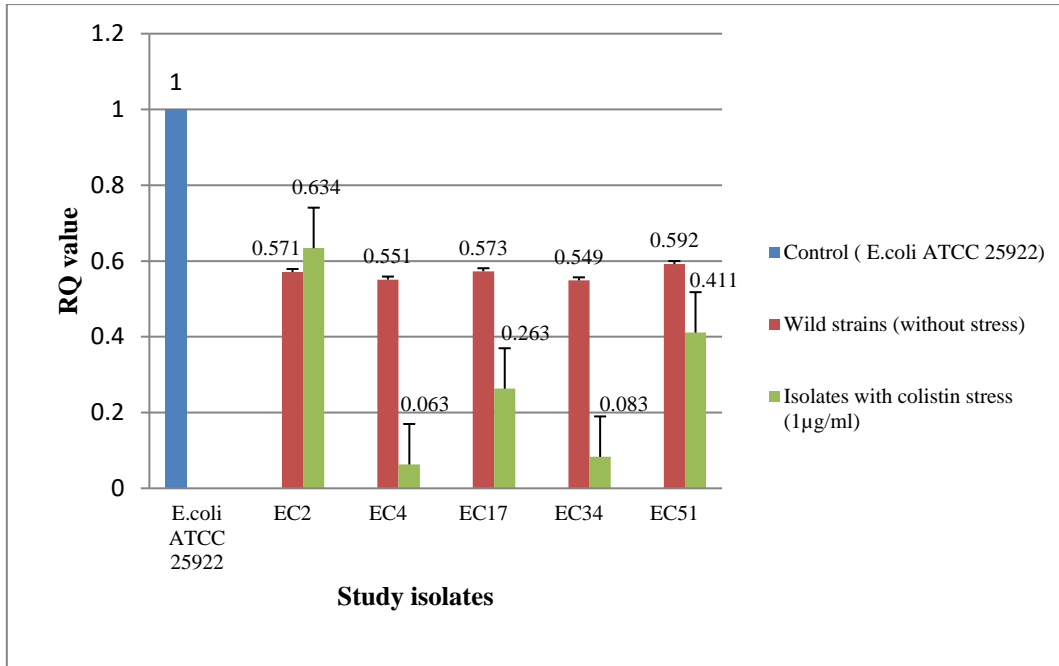

Supplementary figure S6: Transcriptional analysis of *eptA* for the transformants (in *E. coli* DH5α)

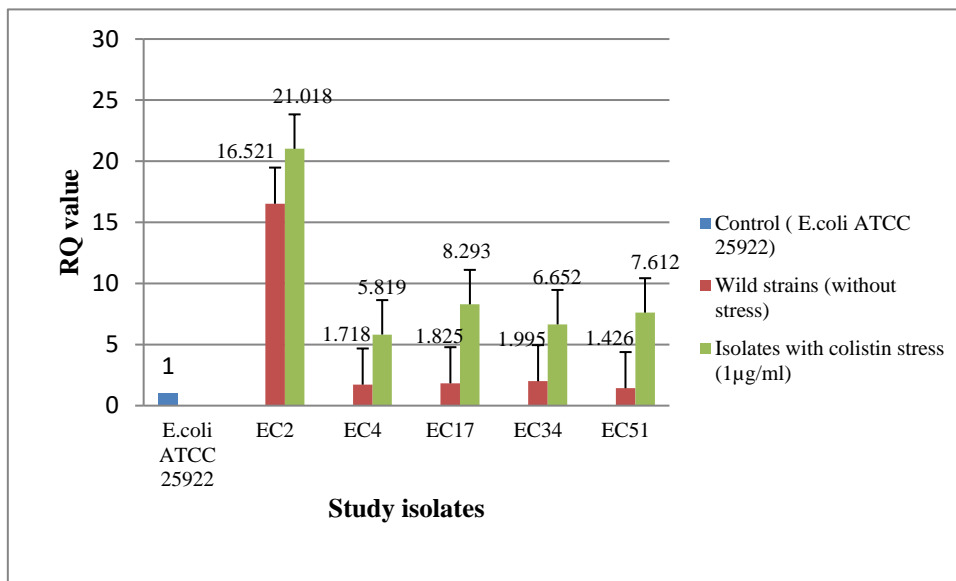

Supplementary figure S7: Transcriptional analysis of *eptB* for the transformants (in *E. coli* DH5α)

Supplementary table ST1: Biological processes with which *eptB* gene is associated

| <b>Gene</b>                      | <b>Cluster</b> | <b>Avg. Shortest Path Length</b> | <b>Betweenness Centrality</b> | <b>Biological Processes</b>                         |
|----------------------------------|----------------|----------------------------------|-------------------------------|-----------------------------------------------------|
| <i>eptB</i>                      | Cluster 1      | 7.418181818                      | 1.2745098                     | Polysaccharide metabolic process                    |
|                                  |                |                                  |                               | Oligosaccharide metabolic process                   |
|                                  |                |                                  |                               | Carbohydrate biosynthetic process                   |
|                                  |                |                                  |                               | Cellular carbohydrate biosynthetic process          |
|                                  |                |                                  |                               | Cellular polysaccharide metabolic process           |
|                                  |                |                                  |                               | Lipopolysaccharide metabolic process                |
|                                  |                |                                  |                               | Polysaccharide biosynthetic process                 |
|                                  |                |                                  |                               | Oligosaccharide biosynthetic process                |
|                                  |                |                                  |                               | Cellular polysaccharide biosynthetic process        |
|                                  |                |                                  |                               | Lipopolysaccharide core region metabolic process    |
|                                  |                |                                  |                               | Lipopolysaccharide biosynthetic process             |
|                                  |                |                                  |                               | Lipopolysaccharide core region biosynthetic process |
|                                  |                |                                  |                               | Lipid metabolic process                             |
| Cellular lipid metabolic process |                |                                  |                               |                                                     |

|  |  |  |  |                                          |
|--|--|--|--|------------------------------------------|
|  |  |  |  | Lipopolysaccharide metabolic process     |
|  |  |  |  | Membrane lipid metabolic process         |
|  |  |  |  | Phospholipid metabolic process           |
|  |  |  |  | Phospholipid biosynthetic process        |
|  |  |  |  | Membrane lipid biosynthetic process      |
|  |  |  |  | Lipooligosaccharide metabolic process    |
|  |  |  |  | Glycolipid metabolic process             |
|  |  |  |  | Glycolipid biosynthetic process          |
|  |  |  |  | Lipid A metabolic process                |
|  |  |  |  | Lipooligosaccharide biosynthetic process |
|  |  |  |  | Lipid A biosynthetic process             |
|  |  |  |  | Lipid biosynthetic process               |



Supplementary table ST2: Transcriptional expression of *eptA* and *eptB* in the clinical isolates of *Escherichia coli*

| Sl.no | Strain code                    | RQ values of <i>eptA</i> gene in reference to <i>E.coli</i> ATCC 25922 which is assigned to a value 1 |                               | RQ values of <i>eptB</i> gene in reference to <i>E.coli</i> ATCC 25922 which is assigned to a value 1 |                               |
|-------|--------------------------------|-------------------------------------------------------------------------------------------------------|-------------------------------|-------------------------------------------------------------------------------------------------------|-------------------------------|
|       |                                | Wild strains                                                                                          | Strains treated with colistin | Wild strains                                                                                          | Strains treated with colistin |
| 1     | ATCC                           | 1                                                                                                     | 1                             | 1                                                                                                     | 1                             |
| 2     | EC1                            | 0.589                                                                                                 | 0.612                         | 0.962                                                                                                 | 1.941                         |
| 3     | EC2                            | 0.513                                                                                                 | 0.727                         | 23.296                                                                                                | 29.593                        |
| 4     | EC3                            | 0.083                                                                                                 | 0.071                         | 0.145                                                                                                 | 0.032                         |
| 5     | EC4                            | 0.032                                                                                                 | 0.068                         | 2.148                                                                                                 | 6.185                         |
| 6     | EC5                            | 0.129                                                                                                 | 0.089                         | 0.824                                                                                                 | 0.03                          |
| 7     | EC6                            | 0.087                                                                                                 | 0.091                         | 0.293                                                                                                 | 0.045                         |
| 8     | EC10                           | 0.091                                                                                                 | 0.097                         | 0.281                                                                                                 | 0.056                         |
| 9     | EC11                           | 0.078                                                                                                 | 0.082                         | 0.152                                                                                                 | 0.021                         |
| 10    | EC26                           | 0.086                                                                                                 | 0.087                         | 0.271                                                                                                 | 0.015                         |
| 11    | EC17                           | 0.221                                                                                                 | 0.254                         | 2.157                                                                                                 | 11.316                        |
| 12    | EC34                           | 0.067                                                                                                 | 0.081                         | 2.342                                                                                                 | 10.765                        |
| 13    | EC51                           | 0.315                                                                                                 | 0.436                         | 2.336                                                                                                 | 12.853                        |
| 14    | Cured EC2                      | 0.511                                                                                                 | 0.719                         | 22.992                                                                                                | 23.136                        |
| 15    | Cured EC4                      | 0.028                                                                                                 | 0.054                         | 2.068                                                                                                 | 2.153                         |
| 16    | Cured EC17                     | 0.155                                                                                                 | 0.201                         | 2.086                                                                                                 | 2.117                         |
| 17    | Cured EC34                     | 0.031                                                                                                 | 0.048                         | 2.019                                                                                                 | 2.821                         |
| 18    | Cured EC51                     | 0.115                                                                                                 | 0.321                         | 2.125                                                                                                 | 2.021                         |
| 19    | Transformant (plasmid of EC2)  | 0.571                                                                                                 | 0.634                         | 16.521                                                                                                | 21.018                        |
| 20    | Transformant (plasmid of EC4)  | 0.551                                                                                                 | 0.063                         | 1.718                                                                                                 | 5.819                         |
| 21    | Transformant (plasmid of EC17) | 0.573                                                                                                 | 0.263                         | 1.825                                                                                                 | 8.293                         |
| 22    | Transformant (plasmid of EC34) | 0.549                                                                                                 | 0.083                         | 1.995                                                                                                 | 6.652                         |
| 23    | Transformant (plasmid of EC51) | 0.592                                                                                                 | 0.411                         | 1.426                                                                                                 | 7.612                         |

Supplementary table ST3: Oligonucleotides used in this study

| <b>Primer pairs</b> | <b>Target</b> | <b>Sequence(5'-3')</b> | <b>Amplified product size (bp)</b> | <b>Reference</b> |
|---------------------|---------------|------------------------|------------------------------------|------------------|
| Epta1               | <i>eptA</i>   | TCTGCACGGTCTGCCTTATG   | 112                                | This study       |
| Epta2               |               | CAGGCAGTTCTGGTCAACCT   |                                    |                  |
| Eptb1               | <i>eptB</i>   | AGCGTAATACCACGCCGAAA   | 95                                 | This study       |
| Eptb2               |               | GCAACGCAGTGAGAGTTTGG   |                                    |                  |
